# Supplementary material for: Scaling relations and spectral characteristics of tensile microseisms: evidence for opening/closing cracks during hydraulic fracturing
Source: Oxford University Press journal article supplement (doi:10.1093/gji/ggt498), 2014-01-09
Supplement: ggt498_Supplementary_Data.zip [file ggt498_Supplementary_Data.zip]

| Perf1     | Perf2 | Qp  | Qe 95 | Chan 1 | Chan 2 |
|-----------|-------|-----|-------|--------|--------|
| 1         | 11    | 235 | 38    | 1      | 1      |
| 1         | 11    | 134 | 21    | 2      | 2      |
| 1         | 11    | 47  | 2     | 3      | 3      |
| 1         | 11    | 98  | 10    | 1      | 2      |
| 1         | 11    | 111 | 9     | 1      | 3      |
| 1         | 11    | 163 | 25    | 2      | 3      |
| 1         | 11    | 107 | 11    | 6      | 6      |
| 1         | 11    | 147 | 20    | 6      | 3      |
| 1         | 11    | 43  | 2     | 5      | 2      |
| 1         | 12    | 117 | 10    | 1      | 1      |
| 1         | 12    | 61  | 3     | 3      | 3      |
| 1         | 12    | 200 | 33    | 4      | 4      |
| 1         | 12    | 72  | 5     | 5      | 6      |
| 1         | 12    | 50  | 1.5   | 3      | 1      |
| 1         | 12    | 79  | 7     | 3      | 5      |
| 1         | 12    | 48  | 2     | 5      | 1      |
| 2         | 13    | 83  | 4     | 1      | 1      |
| 2         | 13    | 122 | 16    | 2      | 2      |
| 2         | 14    | 86  | 6     | 2      | 2      |
| 2         | 14    | 85  | 6     | 2      | 2      |
| 4         | 16    | 157 | 22    | 2      | 2      |
| 5         | 19    | 108 | 6     | 3      | 3      |
| 5         | 20    | 119 | 6     | 3      | 4      |
| 6         | 21    | 142 | 9     | 4      | 4      |
| Average   |       | 109 |       |        |        |
| Std. Dev. |       | 49  |       |        |        |
